# Supplementary material for: Density functional study on the CO oxidation reaction mechanism on MnN2-doped graphene
Source: Royal Society of Chemistry journal article supplement (doi:10.1039/d0ra05287f), 2020-01-01
Supplement: d0ra05287f1.pdf [file d0ra05287f1.pdf]

## Supplementary Information

# Density functional study on the CO oxidation reaction mechanism on MnN<sub>2</sub>-doped graphene

Mingming Luo<sup>a</sup>, Zhao Liang<sup>a</sup>, Chao Liu<sup>a,\*</sup>, Xiaopeng Qi<sup>a</sup>, Mingwei Chen<sup>a</sup>, Hui Yang<sup>a</sup>, Tongxiang Liang<sup>a,\*</sup>

<sup>a</sup> Faculty of Materials Metallurgy and Chemistry, Jiangxi University of Science and Technology, Ganzhou 341000, China

\* Corresponding Authors.

E-mail address: [liuchao198967@126.com](mailto:liuchao198967@126.com) (Chao Liu) and [liang\\_tx@126.com](mailto:liang_tx@126.com) (Tongxiang Liang).

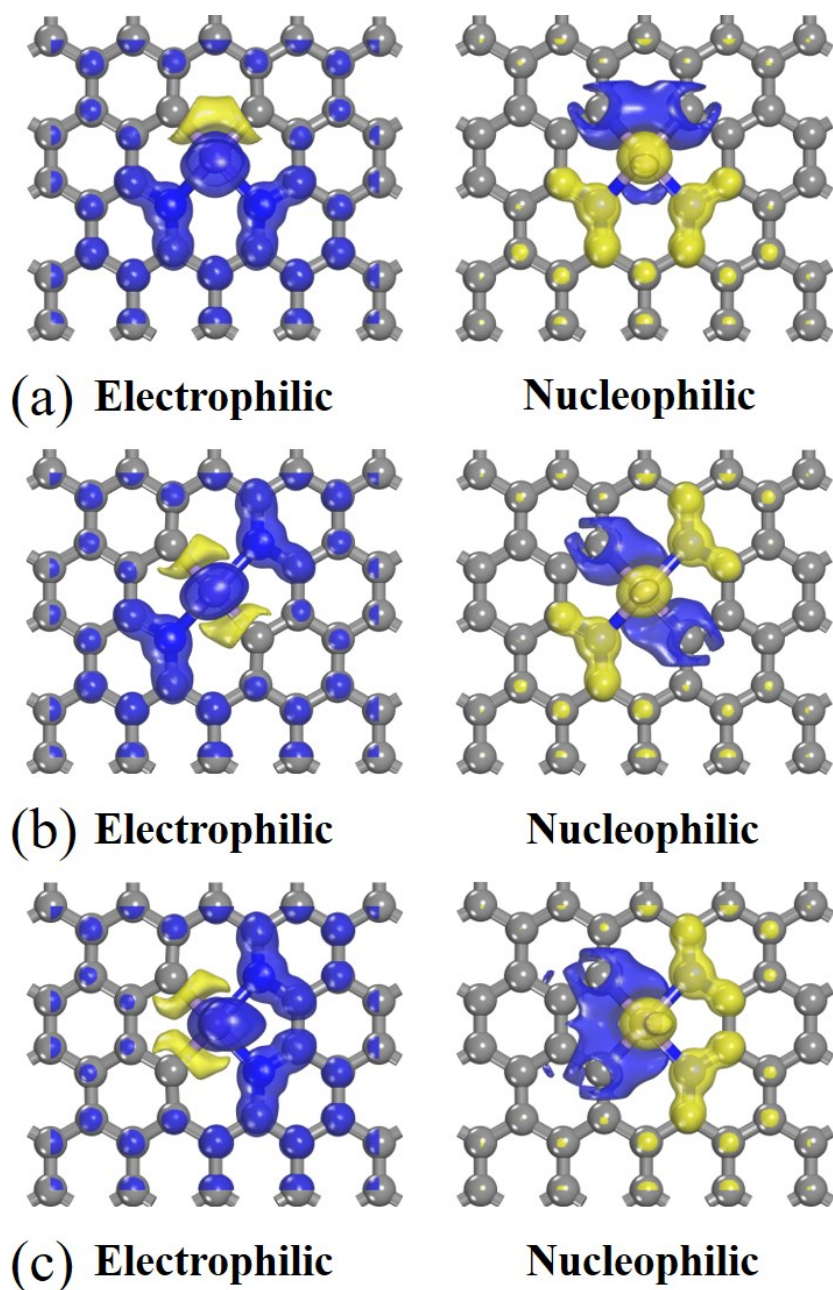

**Fig. S1** The Fukui function of (a)  $\text{MnN}_2\text{C}_2\text{-hex}$ , (b)  $\text{MnN}_2\text{C}_2\text{-opp}$  and (c)  $\text{MnN}_2\text{C}_2\text{-pen}$ , the isosurface value is  $3 \text{ e}/\text{\AA}^3$ .

**Table S1** The adsorption energy (eV) of gas on  $\text{MnN}_2\text{C}_2$ .

|               | $\text{MnN}_2\text{C}_2\text{-hex}$ | $\text{MnN}_2\text{C}_2\text{-opp}$ | $\text{MnN}_2\text{C}_2\text{-pen}$ |
|---------------|-------------------------------------|-------------------------------------|-------------------------------------|
| $\text{CO}_2$ | -0.292                              | -0.270                              | -0.260                              |
| $\text{CO}$   | -1.448                              | -1.318                              | -1.424                              |
| $\text{O}_2$  | -1.778                              | -1.975                              | -1.655                              |

|                   |        |        |        |
|-------------------|--------|--------|--------|
| CO+O <sub>2</sub> | -2.490 | -2.283 | -2.327 |
| 2CO               | -2.423 | -2.524 | -2.395 |

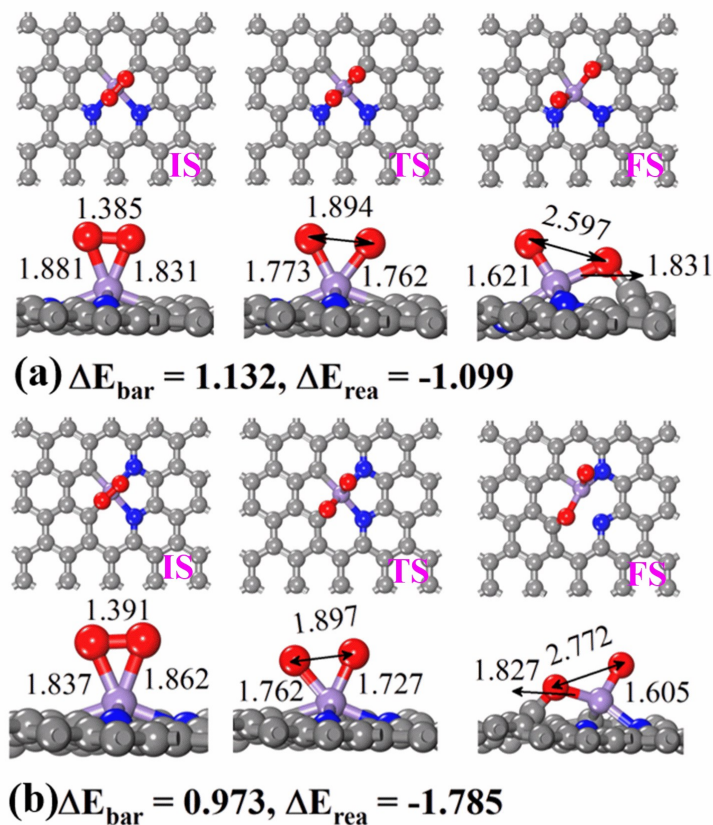

**Fig. S2** Structure of O<sub>2</sub> decomposition reaction on (a) MnN<sub>2</sub>C<sub>2</sub>-hex and (b) MnN<sub>2</sub>C<sub>2</sub>-pen.  $\Delta E_{\text{bar}}$  represents reaction barrier (eV) and  $\Delta E_{\text{rea}}$  represents reaction energy (eV).

**Table S2** The energy barriers and reaction energies of CO oxidation along the ER mechanism.  $\Delta E_{\text{bar}}$  represents reaction barrier (eV) and  $\Delta E_{\text{rea}}$  represents reaction energy (eV).

| Model                                | Reaction                             | $\Delta E_{\text{bar}}$ (eV) | $\Delta E_{\text{rea}}$ (eV) |
|--------------------------------------|--------------------------------------|------------------------------|------------------------------|
| MnN <sub>2</sub> C <sub>2</sub> -hex | CO <sub>3</sub> →O+CO <sub>2</sub>   | 0.704                        | -0.193                       |
|                                      | O <sub>2</sub> +CO→O+CO <sub>2</sub> | 1.101                        | -3.620                       |
| MnN <sub>2</sub> C <sub>2</sub> -opp | CO <sub>3</sub> →O+CO <sub>2</sub>   | 0.961                        | -0.126                       |

|                                      |                             |       |        |
|--------------------------------------|-----------------------------|-------|--------|
|                                      | $O_2+CO \rightarrow O+CO_2$ | 0.544 | -3.611 |
| MnN <sub>2</sub> C <sub>2</sub> -pen | $CO_3 \rightarrow O+CO_2$   | 1.110 | -0.334 |
|                                      | $O_2+CO \rightarrow O+CO_2$ | 0.950 | -3.761 |

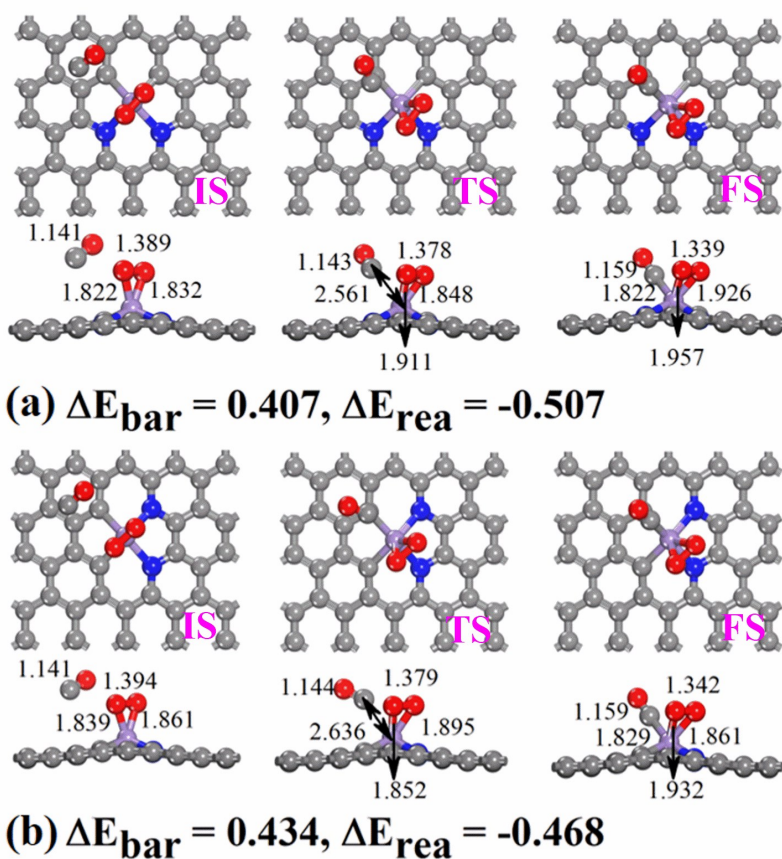

**Fig. S3** Structure of the  $CO + *O_2 \rightarrow *CO + *O_2$  reaction on (a) MnN<sub>2</sub>C<sub>2</sub>-hex and (b) MnN<sub>2</sub>C<sub>2</sub>-pen.  $\Delta E_{\text{bar}}$  represents reaction barrier (eV) and  $\Delta E_{\text{rea}}$  represents reaction energy (eV).

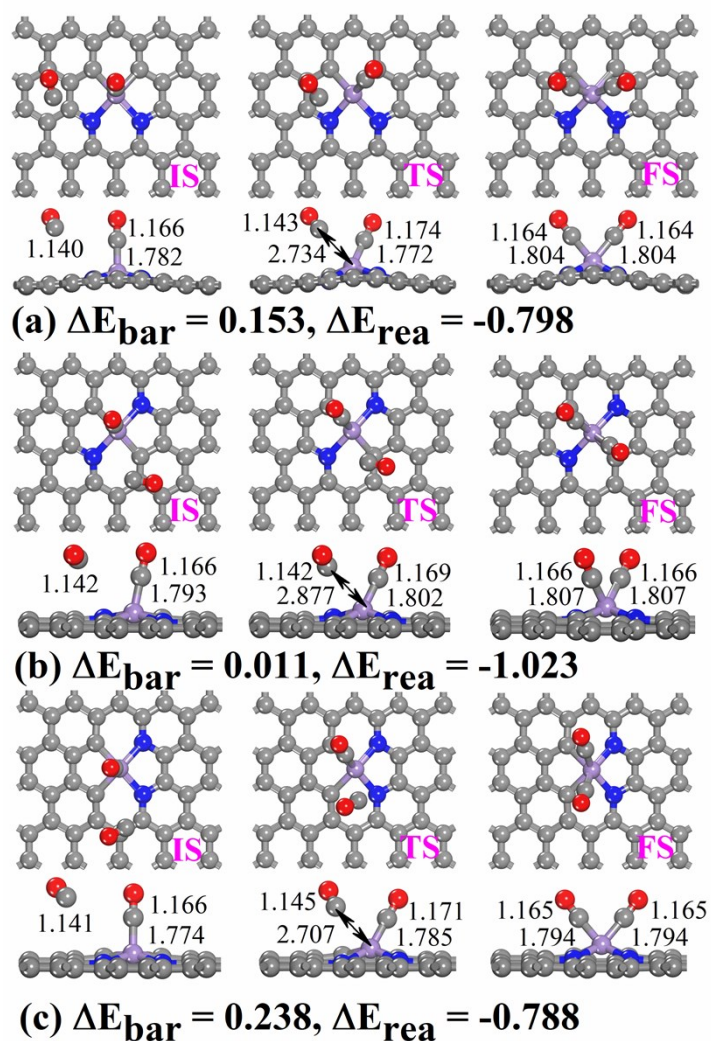

**Fig. S4** The second CO is adsorbed on the Mn atom to form structure of two CO co-adsorption on (a) MnN<sub>2</sub>C<sub>2</sub>-hex, (b) MnN<sub>2</sub>C<sub>2</sub>-opp and (c) MnN<sub>2</sub>C<sub>2</sub>-pen.  $\Delta E_{\text{bar}}$  represents reaction barrier (eV) and  $\Delta E_{\text{rea}}$  represents reaction energy (eV).



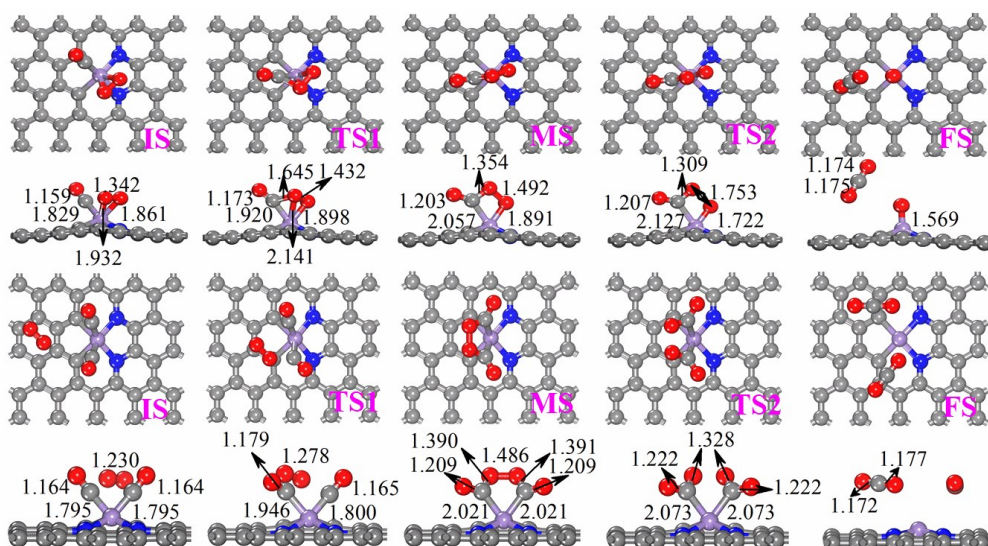

**Fig. S5** Structure of the oxidation of CO on MnN<sub>2</sub>C<sub>2</sub>-pen along the LH and TER mechanisms.

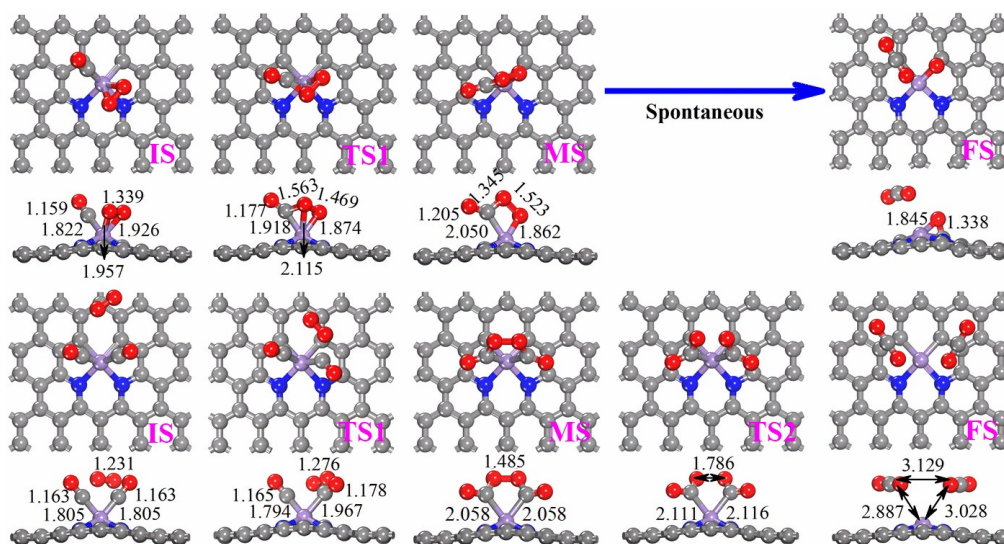

**Fig. S6** Structure of the oxidation of CO on MnN<sub>2</sub>C<sub>2</sub>-hex along the LH and TER mechanisms.

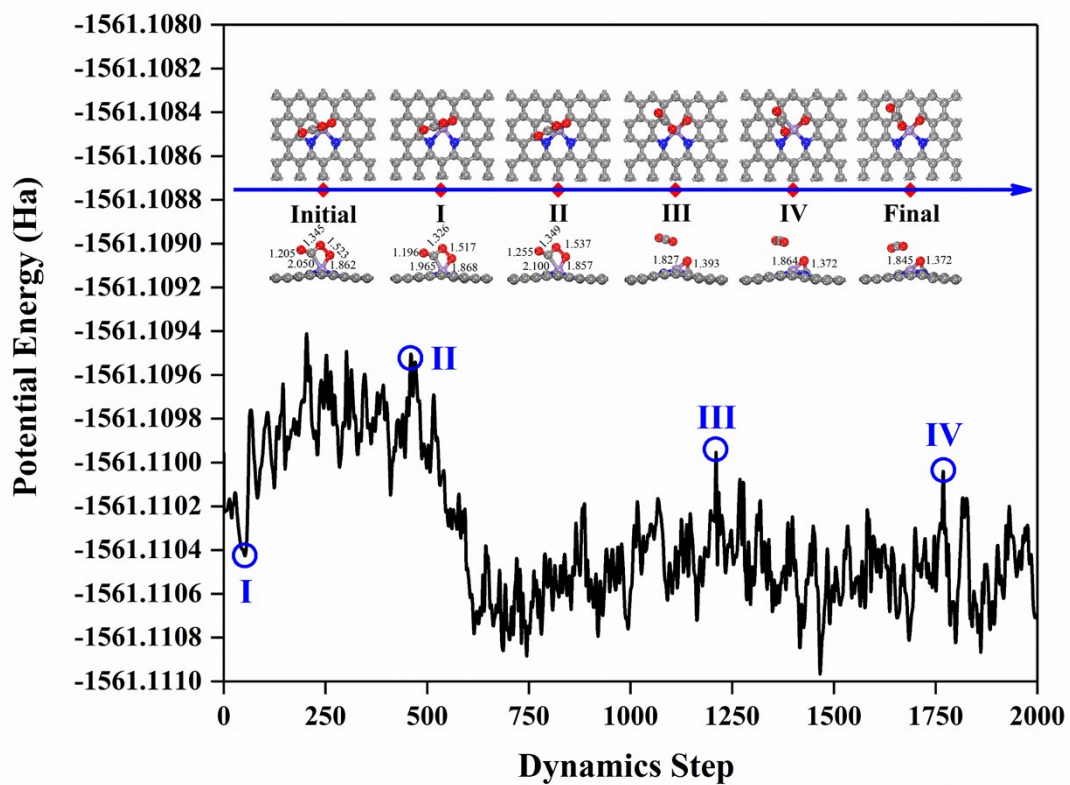

**Fig. S7** Molecular dynamics trajectory of intermediate product OCOO spontaneously decomposes into O and CO<sub>2</sub> on MnN<sub>2</sub>C<sub>2</sub>-hex at 350 K with snapshots of intermediates at different times.
